# Supplementary material
Source: publisher figshare collection journal article supplement (https://acs.figshare.com/ndownloader/files/3915307)
Supplement: Supplementary file 1 [file 3915307]

Supporting Information for

## **Understanding and Modeling Removal of Anionic Organic Contaminants (AOCs) by Anion Exchange Resins**

Huichun Zhang\*, Anthony J. Shields, Nastaran Jadbabaei, Maurice Nelson, Bingjun Pan and  
Rominder P.S. Suri

Department of Civil and Environmental Engineering, Temple University  
1947 North 12<sup>th</sup> Street, Philadelphia, PA 19122

\*Corresponding Author, contact e-mail: [hjzhang@temple.edu](mailto:hjzhang@temple.edu), phone: (215)204-4807, fax:  
(215)204-4696

**Texts:** 5

**Tables:** 7

**Figures:** 5

### Text S1. Polanyi Dubinin-Astakhov Model

The Polanyi theory was originally developed to account for sorption of gas molecules to porous materials.<sup>1</sup> It has been widely accepted as a powerful theory for the sorption of both gas and aqueous solutes toward heterogeneous surfaces and pores such as activated carbon and carbon nanomaterials.<sup>2-4</sup> Briefly, the sorption potential ( $\varepsilon$ ) in the theory was defined as the energy that is required to move a molecule from the attractive force field of the solid surface to bulk solution. The sorption potential varies with solute concentration and can be calculated by the following equation:

$$\varepsilon = -RT \ln(C_w / C_w^{sat}) \quad (S1)$$

where  $C_w^{sat}$  ( $\mu\text{mol/L}$ ) is the aqueous solubility of the solute. In the Polanyi-Dubinin or Dubinin-Astakhov model (D-A model):<sup>5-7</sup>

$$\log q_e = \log Q^0 - \left(\frac{\varepsilon}{E_o}\right)^b \quad (S2)$$

$Q^0$  ( $\mu\text{mol/g}$ ) is the maximum sorption capacity of the solute, and  $E_o$  and  $b$  are the fitting parameters.  $E_o$  (KJ/mol) is the correction factor and was supposed to account for all the interaction forces involved in sorption,<sup>3,4,8</sup>  $b$  likely describes the heterogeneity of the interaction energy.<sup>9</sup> The model fitting results are in Table S1.

### Text S2. Calculation of $\Delta G_{S-W,i}$ for neutral compounds.

Similar to our recent work<sup>10</sup>:

$$\Delta G_{S-W,i} = -RT \ln K_{S-W,i} + \text{Const} \quad (S3)$$

$$\ln K_{S-W,i} = \ln \frac{1000 \times Q_e}{C_e} \quad (S4)$$

Based on Zhu and Pignatello 2005<sup>11</sup>,

$$\text{Const} / RT = \ln \gamma_{w,i} + \ln \frac{V_w}{V_i} - \left[ \left(1 - \frac{V_i}{V_s}\right) + X_{S-i} \right] \quad (S5)$$

where  $\gamma_{w,i}$  is the solute activity coefficient in water;  $V_i$ ,  $V_w$ , and  $V_s$  are the molar volumes of solute, water, and sorbent, respectively; and  $X_{S-i}$  is the Flory-Huggins solute-sorbent interaction parameter that corrects for the entropy loss upon mixing when the polymer suffers certain restriction on its orientation.<sup>12</sup> Given the non-ideal behavior of neutral OCs in water, we calculated  $\gamma_{w,i}$  based on solute solubility and melting point<sup>13</sup>. Because there is entropy loss upon sorption, we assume  $X_{S-i} = -1$ . Given that  $V_i \ll V_s$ ,  $\text{Const}/RT$  is calculated based on the eq below:

$$\text{Const} / RT = \ln \gamma_{w,i} + \ln \frac{\bar{V}_w}{\bar{V}_i} \quad (S6)$$

**Text S3. Analytical methods.**

Agilent Technologies 1200 Infinity Series HPLC was used to analyze aromatic solutes except BS. Each of the carboxylic acids has a pKa value between 2.3 and 4.5. Because of this, the mobile phase needed to be acidified to make sure speciation of the compounds resulted in predominately neutral species. This was performed using diluted phosphoric acid at a pH of 3.00. For the acidified mobile phases a Zorbax RX-C18 column was used. The neutral compounds used a mobile phase of nanopure water and methanol while using a Zorbax XDB-C18 column. The DAD detector was set at 230 – 382 nm.

UV/visible spectroscopy was used to measure the concentrations of benzenesulfonate at 215 nm. TOC analysis using a Shimadzu TOC-V<sub>CSH</sub> was necessary to determine the concentrations of the aliphatic carboxylates which do not have sufficient ability for UV/Visible detection. Potassium hydrogen phthalate was used to calibrate the total carbon measurements from a range of 0.25 – 10 mg of carbon per liter. Injections of 100 µL were used to measure sample concentrations and were repeated three times for accuracy. Inorganic carbon tests were found to be negligible when measuring these samples. Concentrations from the TOC machine were converted from mg/L of carbon to molar concentrations based on the number of carbons within the compound. The detection limit of TOC analysis (~700 µM) was higher than the other two methods and thus was used only on compounds that are incapable of detection via the other analytical methods.

**Text S4. Experiments on pH Effects.**

For these experiments, solutions of 10-20 mL were prepared in amber bottles with Teflon sealed caps each with the same concentration of 2.0-5.0 mM benzoic acid (BA), nitrobenzene (NB) or benzenesulfonate (BS) and 0.020 M NaCl. These solutions were added to 10-70 mg of resin in order to achieve a removal percentage between 20-80% and placed on a shaker at 175 rpm. pHs were adjusted using either NaOH or HCl solutions and repeatedly adjusted over a 48 hour period to maintain a constant pH over the course of the experiment. Aliquots of the reactors were taken for initial and equilibrium concentrations. Samples were analyzed using HPLC (for BA and NB) or UV-spectrometry (for BS).

**Text S5. Titration Experiments.**

The resins were prepared by crushing with a mortar and pestle to shorten the time required to reach a pH equilibrium with the solution. 20 mL reactors were prepared of DI water and equal amounts of crushed resin. The solution of DI water and resin was allowed to reach an equilibrium pH where titration was then started by adding increasing increments of NaOH and HCl. The samples were then allowed to shake for 24-48 hours until a new pH equilibrium was achieved. pH's were then read from the pH meter and analyzed.

**Table S1. Isotherm modeling results: a) D-A model fitting parameters:**

| Solute  | $C_w^{Sat}$<br>( $\mu\text{mol/L}$ )* | IRA-910 |       |      |       | IRA-96 |       |      |       | A860  |       |       |       |
|---------|---------------------------------------|---------|-------|------|-------|--------|-------|------|-------|-------|-------|-------|-------|
|         |                                       | $Q_0$   | $E_0$ | b    | $R^2$ | $Q_0$  | $E_0$ | b    | $R^2$ | $Q_0$ | $E_0$ | b     | $R^2$ |
| BA      | 23700                                 | 3755    | 8.99  | 1.11 | 0.978 | 2912.3 | 9.74  | 1.34 | 0.995 | 1753  | 7.89  | 1.27  | 0.992 |
| CBA     | 511                                   | 642     | 6.70  | 1.02 | 0.999 | 871    | 8.30  | 1.06 | 0.988 | 162   | 3.90  | 0.68  | 0.997 |
| 2-NBA   | 1480                                  | 1084    | 7.62  | 1.10 | 0.998 | 1182   | 8.81  | 1.16 | 0.998 | 220   | 5.49  | 0.95  | 0.999 |
| 4-NBA   | 1020                                  | 1232    | 7.18  | 1.02 | 0.999 | 1108   | 10.43 | 1.36 | 0.999 | 138   | 4.90  | 0.88  | 1.000 |
| MBA     | 1970                                  | 942     | 6.87  | 1.05 | 0.999 | 706    | 8.65  | 1.36 | 0.998 | 209   | 5.67  | 1.05  | 1.000 |
| Naph    | 635                                   | 774     | 7.51  | 1.12 | 1.000 | 553    | 10.20 | 1.54 | 0.989 | 205   | 4.70  | 0.82  | 0.999 |
| BS      | soluble <sup>a</sup>                  | 2162290 | 6.12  | 1.01 | 0.972 | 5718   | 20.98 | 2.47 | 0.993 | 4608  | 18.73 | 2.35  | 0.997 |
| IBU     | soluble <sup>b</sup>                  | 5029    | 13.54 | 1.60 | 0.998 | —      | —     | —    | —     | —     | —     | —     | —     |
| Acetate | soluble <sup>c</sup>                  | 441677  | 8.01  | 1.17 | 0.985 | —      | —     | —    | —     | —     | —     | —     | —     |
| IB      | soluble <sup>c</sup>                  | 1982500 | 6.49  | 1.10 | 0.879 | —      | —     | —    | —     | 13711 | 16.11 | 1.66  | 0.984 |
| DCA     | soluble <sup>c</sup>                  | 532887  | 12.57 | 1.50 | 0.965 | —      | —     | —    | —     | 249   | 31.51 | 11.45 | 0.887 |
| NPN     | 115025                                | 10544   | 15.78 | 1.54 | 0.989 | —      | —     | —    | —     | —     | —     | —     | —     |
| 2,6-DCP | 46000                                 | 11220   | 13.73 | 1.68 | 1.000 | —      | —     | —    | —     | —     | —     | —     | —     |
| PHTH    | 36114                                 | 1396    | 19.12 | 2.30 | 0.988 | —      | —     | —    | —     | —     | —     | —     | —     |
| TERE    | 102                                   | 716     | 9.03  | 1.53 | 0.982 | —      | —     | —    | —     | —     | —     | —     | —     |
| FLU     | 1000                                  | 424     | 5.53  | 1.00 | 0.975 | —      | —     | —    | —     | —     | —     | —     | —     |
| CIP     | 90541                                 | 1523    | 15.78 | 1.63 | 0.994 | —      | —     | —    | —     | —     | —     | —     | —     |
| 4-CA    | 21596                                 | 693     | 7.37  | 1.18 | 0.994 | 2694   | 6.11  | 0.89 | 0.984 | —     | —     | —     | —     |
| 4-NA    | 5792                                  | 472     | 7.79  | 1.12 | 0.970 | 717    | 9.43  | 1.29 | 0.999 | —     | —     | —     | —     |
| Phenol  | 852088                                | 16299   | 6.10  | 1.00 | 0.999 | 9996   | 9.02  | 1.15 | 1.000 | —     | —     | —     | —     |
| 4-MP    | 175714                                | 2983    | 7.67  | 1.11 | 1.000 | 1784   | 12.53 | 1.55 | 1.000 | —     | —     | —     | —     |
| NB      | 16982                                 | 124     | 8.37  | 1.20 | 0.996 | 813    | 6.47  | 0.96 | 0.996 | —     | —     | —     | —     |

\* For solutes with high solubility, the following hypothetical solubility was used in the D-A model fitting: <sup>a</sup> 5,162,000  $\mu\text{mol/L}$ , <sup>b</sup> 100,000  $\mu\text{mol/L}$ , and <sup>c</sup>  $10^8$   $\mu\text{mol/L}$ . Although the obtained D-A model fitting parameters may be different from the real numbers, we mainly used them to estimate  $C_e$  at any given  $Q_e$ . Therefore, the selection of these solubility values should not affect later calculations.

**b) Freundlich model ( $q_i = K_F C_i^n$ ) fitting parameters <sup>a</sup>:**

| Solute  | IRA-96 |        |       | A860   |     |       |
|---------|--------|--------|-------|--------|-----|-------|
|         | $K_f$  | n      | $R^2$ | $K_f$  | n   | $R^2$ |
| Acetate | 3.56   | 0.3763 | 0.919 | 0.5084 | 0.6 | 0.945 |
| IB      | 0.891  | 0.590  | 0.817 | —      | —   | —     |
| DCA     | 0.44   | 0.994  | 0.879 | —      | —   | —     |

<sup>a</sup> For these isotherms, equilibrium concentrations were within a narrow range due to the analytical limitation in TOC analysis. Although the D-A model fittings were very good for these isotherms, larger errors in the predicted  $Q_e$  were observed particularly at lower equilibrium concentrations because the D-A model has three fitting parameters (data not shown). The Freundlich model with only two fitting parameters was thus applied to fit the isotherms.

**Table S2.** Linear correlation between experimentally used m/V (g/L) and  $Q_e$  ( $\mu\text{mol/L}$ ).

| Solute  | IRA-910              |                | IRA-96               |                | A860                 |                |
|---------|----------------------|----------------|----------------------|----------------|----------------------|----------------|
|         | m/V=f( $Q_e$ )       | R <sup>2</sup> | m/V=f( $Q_e$ )       | R <sup>2</sup> | m/V=f( $Q_e$ )       | R <sup>2</sup> |
| BA      | $0.0036Q_e + 0.1542$ | 0.94           | $0.0094Q_e + 0.8979$ | 0.90           | $0.0108Q_e + 1.0521$ | 0.94           |
| CBA     | $0.0004Q_e + 0.1356$ | 0.92           | $0.0008Q_e + 0.1921$ | 0.91           | $0.1112Q_e + 3.7$    | 0.98           |
| 2-NBA   | $0.0007Q_e + 0.1864$ | 0.82           | $0.0008Q_e + 0.2731$ | 0.77           | $0.0832Q_e + 2.3695$ | 0.77           |
| 4-NBA   | $0.0004Q_e + 0.1322$ | 0.94           | $0.0006Q_e + 0.1905$ | 0.93           | $0.4939Q_e + 3.2088$ | 0.89           |
| MBA     | $0.0019Q_e + 0.3018$ | 0.92           | $0.0011Q_e + 0.2701$ | 0.92           | $0.0051Q_e + 3.7619$ | 0.42           |
| Naph    | $0.0004Q_e + 0.1303$ | 0.95           | $0.0008Q_e + 0.2177$ | 0.92           | $0.1033Q_e + 3.6244$ | 0.98           |
| IBU     | $0.0022Q_e + 0.257$  | 0.99           | —                    | —              | —                    | —              |
| Acetate | $0.3301Q_e + 13.822$ | 0.87           | $0.1992Q_e + 15.827$ | 0.84           | $0.3118Q_e + 11.836$ | 0.78           |
| IB      | $0.26Q_e + 15.181$   | 0.77           | $0.0919Q_e + 1.5519$ | 0.48           | $0.1439Q_e + 6.084$  | 0.66           |
| DCA     | $0.0334Q_e + 8.9487$ | 0.91           | $0.0068Q_e + 4.3451$ | 0.85           | $0.0407Q_e + 4.8443$ | 0.82           |
| NPN     | $0.0001Q_e$          | 0.92           | —                    | —              | —                    | —              |
| 2,6-DCP | $0.0001Q_e + 0.0446$ | 0.91           | —                    | —              | —                    | —              |
| PHTH    | $0.0004Q_e$          | 0.72           | —                    | —              | —                    | —              |
| TERE    | $3E-05Q_e + 0.0246$  | 0.81           | —                    | —              | —                    | —              |
| FLU     | $0.0366Q_e + 0.9832$ | 0.79           | —                    | —              | —                    | —              |
| CIP     | $0.0292Q_e + 0.7091$ | 0.59           | —                    | —              | —                    | —              |
| BS      | $0.0024Q_e + 0.4362$ | 0.98           | $0.0055Q_e + 1.0044$ | 0.89           | $0.0196Q_e + 2.4618$ | 0.83           |

**Table S3.** Properties of the selected resins.

| Name    | Structure <sup>a</sup>         | Functional Group <sup>a</sup> | Exchange Capacity (meq/g-dry) <sup>c</sup> | BET Surface Area <sup>a</sup> (m <sup>2</sup> /g) | Moisture content % <sup>c</sup> |
|---------|--------------------------------|-------------------------------|--------------------------------------------|---------------------------------------------------|---------------------------------|
| IRA-910 | MP <sup>b</sup> , Polystyrene  | Dimethyl ethanol Ammonium     | 5.33                                       | NA                                                | 53.4 ± 0.2                      |
| IRA-96  | MP <sup>b</sup> , Polystyrene  | Tertiary amine                | 6.19                                       | NA                                                | 58.8 ± 0.1                      |
| A860    | MP <sup>b</sup> , polyacrylate | Quaternary Ammonium           | 7.13                                       | NA                                                | 70.1 ± 0.1                      |
| MN100   | MP <sup>b</sup> , Polystyrene  | Tertiary amine                | 0.23                                       | ≥ 900                                             | 57.3 ± 0.1                      |
| MN200   | MP <sup>b</sup> , Polystyrene  | None                          | —                                          | 1021                                              | 57.6 ± 0.0                      |

<sup>a</sup> reported by the manufacturer, <sup>b</sup> macroporous, <sup>c</sup> this work.

**Table S4.** Regression coefficients of multiple linear regressions between  $\ln(\alpha_{A/Cl})$  and solute descriptors for sorption of all anions except BS onto IRA-910.  $Q_e$ :  $\mu\text{mol/g}$ .

| $Q_e$ | $c$        | $e$       | $s$        | $b$        | $v$        | $j^-$     | $R^2$ |
|-------|------------|-----------|------------|------------|------------|-----------|-------|
| 1     | -6.95±1.66 | 4.70±1.77 | 0.64±1.01  | -1.88±0.84 | 0.39±0.88  | 3.52±1.45 | 0.890 |
| 2     | -6.83±1.67 | 4.74±1.78 | 0.57±1.02  | -1.73±0.84 | 0.32±0.89  | 3.37±1.46 | 0.886 |
| 5     | -6.64±1.68 | 4.81±1.79 | 0.47±1.02  | -1.55±0.85 | 0.25±0.89  | 3.19±1.47 | 0.880 |
| 10    | -6.46±1.68 | 4.88±1.79 | 0.37±1.02  | -1.44±0.85 | 0.20±0.89  | 3.08±1.47 | 0.876 |
| 20    | -6.23±1.67 | 4.95±1.78 | 0.26±1.02  | -1.34±0.84 | 0.15±0.89  | 2.98±1.46 | 0.872 |
| 50    | -5.79±1.64 | 5.04±1.75 | 0.08±1.00  | -1.25±0.83 | 0.10±0.87  | 2.87±1.43 | 0.867 |
| 100   | -5.25±1.58 | 5.08±1.70 | -0.09±0.96 | -1.21±0.80 | 0.07±0.84  | 2.80±1.38 | 0.862 |
| 200   | -4.28±1.47 | 5.01±1.58 | -0.32±0.90 | -1.16±0.78 | 0.02±0.78  | 2.69±1.29 | 0.854 |
| 500   | -1.81±1.27 | 4.43±1.36 | -0.70±0.77 | -1.07±0.67 | -0.01±0.67 | 2.34±1.11 | 0.807 |

**Table S5.** The corresponding p-values for the regression coefficients in Table S4.  $Q_e$ :  $\mu\text{mol/g}$ .

| $Q_e$ | $c$   | $e$   | $s$   | $b$   | $v$   | $j^-$ |
|-------|-------|-------|-------|-------|-------|-------|
| 1     | 0.002 | 0.026 | 0.54  | 0.052 | 0.669 | 0.038 |
| 2     | 0.003 | 0.026 | 0.586 | 0.071 | 0.723 | 0.046 |
| 5     | 0.003 | 0.025 | 0.659 | 0.101 | 0.788 | 0.057 |
| 10    | 0.004 | 0.024 | 0.725 | 0.125 | 0.831 | 0.065 |
| 20    | 0.005 | 0.022 | 0.804 | 0.146 | 0.869 | 0.072 |
| 50    | 0.006 | 0.018 | 0.936 | 0.164 | 0.909 | 0.076 |
| 100   | 0.009 | 0.015 | 0.928 | 0.165 | 0.938 | 0.074 |
| 200   | 0.018 | 0.011 | 0.732 | 0.153 | 0.978 | 0.067 |
| 500   | 0.187 | 0.01  | 0.386 | 0.128 | 0.985 | 0.064 |

**Table S6.** Three sets of regression coefficients for the multiple linear regressions between the net Gibbs free energy change and solute descriptors for IRA-910 with the following compounds included in the regressions: a) all solutes except BS, b) 16 solutes in the training set, and c) all anions except BS.

| Set                   | $Q_e$ | $c$         | $e$        | $s$        | $a$        | $b$        | $v$        | $j^-$     | $R^2$ |
|-----------------------|-------|-------------|------------|------------|------------|------------|------------|-----------|-------|
| a) All<br>Solute      | 1     | -18.21±2.14 | 10.07±2.78 | 1.98±1.47  | 18.09±4.22 | -4.64±1.72 | 0.50±1.55  | 9.40±3.05 | 0.917 |
|                       | 2     | -18.07±2.15 | 10.12±2.78 | 1.85±1.47  | 17.93±4.23 | -4.26±1.72 | 0.30±1.55  | 9.06±3.06 | 0.916 |
|                       | 5     | -17.89±2.15 | 10.13±2.79 | 1.70±1.48  | 17.78±4.23 | -3.80±1.72 | 0.03±1.56  | 8.66±3.06 | 0.914 |
|                       | 10    | -17.75±2.15 | 10.08±2.79 | 1.60±1.48  | 17.75±4.24 | -3.49±1.72 | -0.20±1.56 | 8.40±3.06 | 0.912 |
|                       | 20    | -17.59±2.15 | 9.97±2.79  | 1.51±1.48  | 17.80±4.23 | -3.21±1.72 | -0.45±1.55 | 8.18±3.06 | 0.911 |
|                       | 50    | -17.32±2.14 | 9.60±2.77  | 1.45±1.47  | 18.10±4.21 | -2.89±1.72 | -0.84±1.55 | 7.96±3.05 | 0.909 |
|                       | 100   | -16.10±2.13 | 8.94±2.77  | 1.51±1.47  | 18.72±4.21 | -2.66±1.71 | -1.28±1.55 | 7.82±3.04 | 0.907 |
|                       | 200   | -13.88±2.78 | 8.93±2.94  | 0.82±1.61  | 13.42±6.43 | -2.50±1.69 | -1.25±1.62 | 7.22±3.01 | 0.862 |
|                       | 500   | -9.05±2.75  | 6.13±2.91  | 0.93±1.60  | 9.51±6.37  | -1.77±1.69 | -1.99±1.60 | 5.59±3.05 | 0.817 |
| b)<br>Training<br>Set | 1     | -17.42±2.85 | 10.63±3.52 | 2.07±1.78  | 17.71±5.38 | -4.82±2.18 | -0.98±2.19 | 9.55±3.80 | 0.906 |
|                       | 2     | -17.35±2.90 | 10.62±3.59 | 1.92±1.82  | 17.58±5.48 | -4.43±2.22 | -0.98±2.23 | 9.2±3.872 | 0.902 |
|                       | 5     | -17.29±2.96 | 10.51±3.67 | 1.74±1.86  | 17.52±5.60 | -3.94±2.27 | -0.98±2.28 | 8.80±3.95 | 0.898 |
|                       | 10    | -17.26±3.00 | 10.34±3.71 | 1.63±1.88  | 17.59±5.67 | -3.58±2.29 | -0.99±2.30 | 8.48±4.00 | 0.895 |
|                       | 20    | -17.26±3.02 | 10.07±3.74 | 1.56±1.89  | 17.79±5.71 | -3.23±2.31 | -0.98±2.32 | 8.17±4.03 | 0.893 |
|                       | 50    | -17.26±3.03 | 9.44±3.75  | 1.55±1.90  | 18.37±5.73 | -2.77±2.32 | -1.00±2.33 | 7.74±4.04 | 0.892 |
|                       | 100   | -17.24±3.01 | 8.50±3.73  | 1.70±1.89  | 19.37±5.70 | -2.37±2.30 | -1.11±2.32 | 7.33±4.02 | 0.893 |
|                       | 200   | -14.31±4.23 | 8.26±4.10  | 1.03±2.24  | 14.37±9.37 | -2.16±2.34 | -0.89±2.40 | 6.75±4.04 | 0.828 |
|                       | 500   | -10.72±4.11 | 4.76±3.98  | 1.62±2.20  | 13.06±9.22 | -1.11±2.28 | -1.31±2.33 | 4.61±3.97 | 0.793 |
| c) All<br>Anions      | 1     | -17.21±4.10 | 11.64±4.39 | 1.59±2.50  | —          | -4.65±2.07 | 0.96±2.18  | 8.72±3.59 | 0.890 |
|                       | 2     | -16.92±4.13 | 11.75±4.41 | 1.42±2.52  | —          | -4.28±2.09 | 0.80±2.20  | 8.35±3.61 | 0.886 |
|                       | 5     | -16.45±4.15 | 11.92±4.44 | 1.16±2.53  | —          | -3.84±2.10 | 0.61±2.21  | 7.91±3.63 | 0.880 |
|                       | 10    | -16.00±4.15 | 12.08±4.44 | 0.92±2.53  | —          | -3.56±2.10 | 0.48±2.21  | 7.63±3.63 | 0.876 |
|                       | 20    | -15.43±4.13 | 12.26±4.42 | 0.65±2.52  | —          | -3.32±2.09 | 0.37±2.20  | 7.38±2.62 | 0.872 |
|                       | 50    | -14.35±4.05 | 12.49±4.33 | 0.20±2.47  | —          | -3.10±2.05 | 0.25±2.16  | 7.11±3.54 | 0.867 |
|                       | 100   | -13.00±3.92 | 12.58±4.18 | -0.22±2.39 | —          | -2.99±1.98 | 0.17±2.08  | 6.93±3.42 | 0.862 |
|                       | 200   | -10.60±3.65 | 12.42±3.90 | -0.79±2.23 | —          | -2.89±1.85 | 0.06±1.94  | 6.65±3.20 | 0.854 |
|                       | 500   | -4.48±3.14  | 10.98±3.36 | -1.75±1.92 | —          | -2.66±1.59 | -0.03±1.67 | 5.81±2.75 | 0.807 |

**Table S7.** The corresponding p-values for the regression coefficients in Table S6.

| Set                   | $Q_e$ | $c$   | $e$   | $s$   | $a$   | $b$   | $v$   | $j^-$ |
|-----------------------|-------|-------|-------|-------|-------|-------|-------|-------|
| a) All<br>Solutes     | 1     | 0     | 0.003 | 0.203 | 0.001 | 0.018 | 0.754 | 0.009 |
|                       | 2     | 0     | 0.003 | 0.231 | 0.001 | 0.028 | 0.849 | 0.011 |
|                       | 5     | 0     | 0.003 | 0.27  | 0.001 | 0.046 | 0.987 | 0.014 |
|                       | 10    | 0     | 0.003 | 0.299 | 0.001 | 0.064 | 0.901 | 0.017 |
|                       | 20    | 0     | 0.003 | 0.324 | 0.001 | 0.085 | 0.779 | 0.019 |
|                       | 50    | 0     | 0.004 | 0.341 | 0.001 | 0.116 | 0.595 | 0.021 |
|                       | 100   | 0     | 0.007 | 0.322 | 0.001 | 0.145 | 0.423 | 0.023 |
|                       | 200   | 0     | 0.01  | 0.618 | 0.059 | 0.166 | 0.455 | 0.034 |
|                       | 500   | 0.007 | 0.059 | 0.576 | 0.164 | 0.318 | 0.242 | 0.094 |
| b)<br>Training<br>Set | 1     | 0     | 0.014 | 0.276 | 0.009 | 0.054 | 0.666 | 0.033 |
|                       | 2     | 0     | 0.016 | 0.319 | 0.011 | 0.077 | 0.67  | 0.041 |
|                       | 5     | 0     | 0.019 | 0.374 | 0.012 | 0.116 | 0.676 | 0.053 |
|                       | 10    | 0     | 0.021 | 0.409 | 0.013 | 0.153 | 0.681 | 0.063 |
|                       | 20    | 0     | 0.025 | 0.433 | 0.012 | 0.196 | 0.685 | 0.073 |
|                       | 50    | 0     | 0.033 | 0.435 | 0.011 | 0.263 | 0.678 | 0.088 |
|                       | 100   | 0     | 0.048 | 0.39  | 0.008 | 0.33  | 0.642 | 0.102 |
|                       | 200   | 0.01  | 0.079 | 0.658 | 0.164 | 0.383 | 0.72  | 0.133 |
|                       | 500   | 0.035 | 0.271 | 0.486 | 0.2   | 0.643 | 0.591 | 0.285 |
| c) All<br>Anions      | 1     | 0.002 | 0.026 | 0.54  | —     | 0.052 | 0.669 | 0.038 |
|                       | 2     | 0.003 | 0.026 | 0.586 | —     | 0.071 | 0.723 | 0.046 |
|                       | 5     | 0.003 | 0.025 | 0.659 | —     | 0.101 | 0.788 | 0.057 |
|                       | 10    | 0.004 | 0.024 | 0.725 | —     | 0.125 | 0.831 | 0.065 |
|                       | 20    | 0.005 | 0.022 | 0.804 | —     | 0.146 | 0.869 | 0.072 |
|                       | 50    | 0.006 | 0.018 | 0.936 | —     | 0.164 | 0.909 | 0.076 |
|                       | 100   | 0.009 | 0.015 | 0.928 | —     | 0.165 | 0.938 | 0.074 |
|                       | 200   | 0.018 | 0.011 | 0.732 | —     | 0.153 | 0.978 | 0.067 |
|                       | 500   | 0.187 | 0.01  | 0.386 | —     | 0.128 | 0.985 | 0.064 |

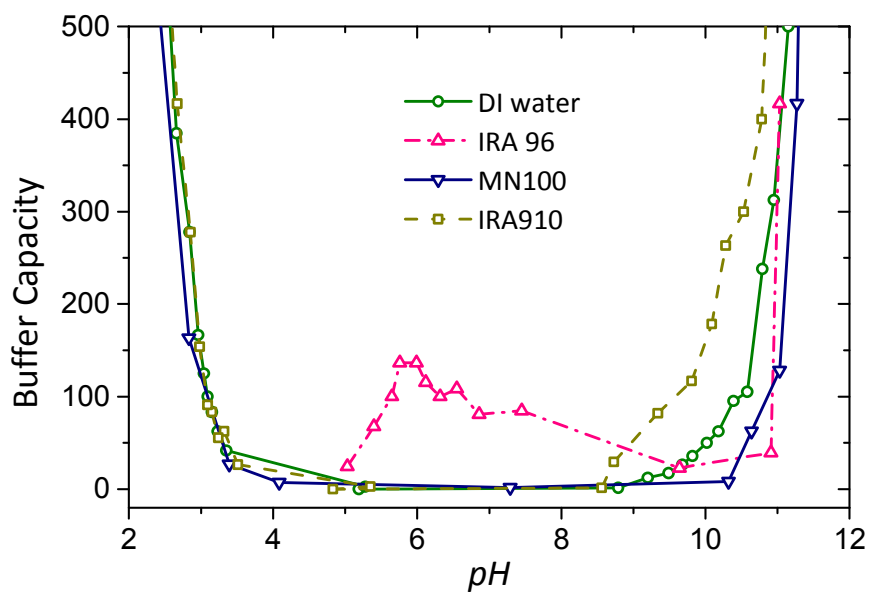

**Figure S1.** The buffering capacities for IRA910, IRA96, and MN100.

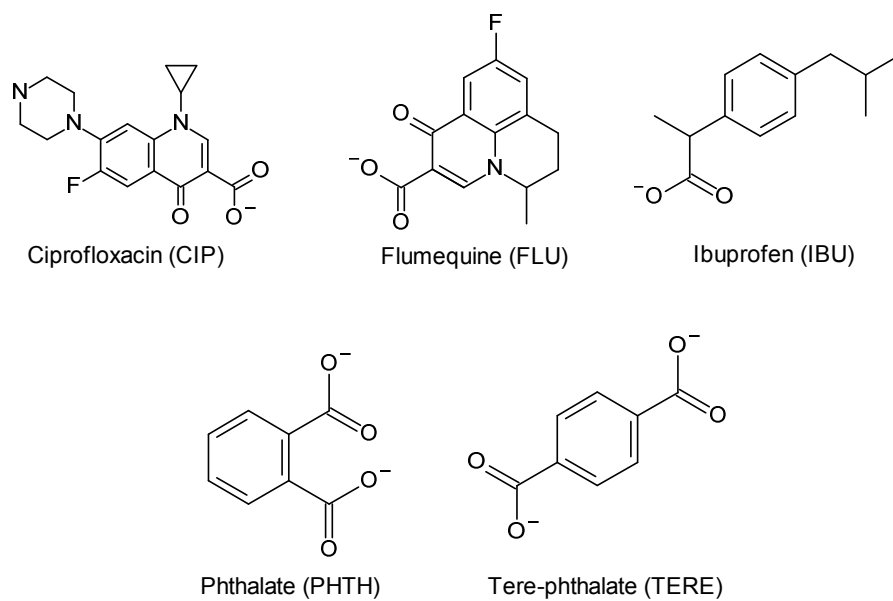

**Figure S2.** Structures of selected anions.

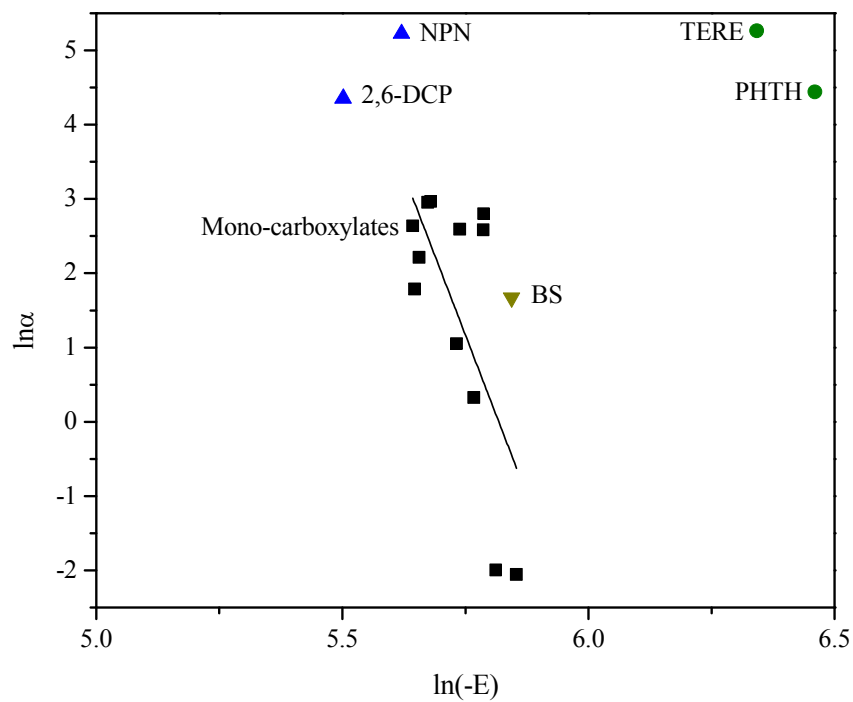

**Figure S3.** Relationship between selectivity (at  $Q_e = 50 \mu\text{mol/g}$ ) and hydration energy for all anions, the regression is for mono-carboxylates only ( $\ln\alpha = -17.24\ln(-E) + 100.3$ ,  $R^2=0.45$ ).

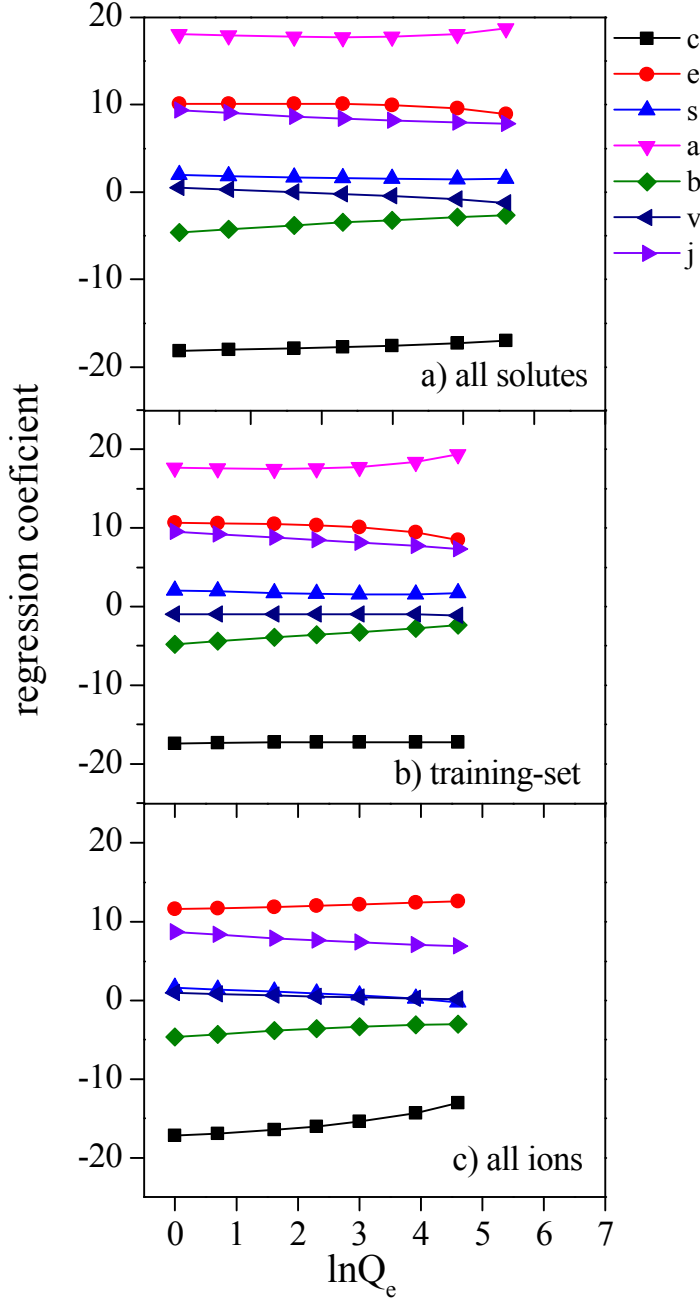

a) All solutes included:

$$c = -2 \times 10^{-7} Q_e^3 + 0.0001 Q_e^2 + 0.0016 Q_e - 17.932, R^2 = 0.995$$

$$e = -1 \times 10^{-7} Q_e^3 + 0.00008 Q_e^2 - 0.0183 Q_e + 10.206, R^2 = 0.995$$

$$s = 0.008 (\ln Q_e)^3 - 0.02791 (\ln Q_e)^2 - 0.1432 (\ln Q_e) + 1.9709, R^2 = 0.999$$

$$a = 0.0141 (\ln Q_e)^3 + 0.0049 (\ln Q_e)^2 - 0.2333 (\ln Q_e) + 18.085, R^2 = 0.999$$

$$b = 0.0131 (\ln Q_e)^3 - 0.125 (\ln Q_e)^2 + 0.7308 (\ln Q_e) - 4.6707, R^2 = 0.999$$

$$v = -0.0103(\ln Q_e)^3 + 0.034(\ln Q_e)^2 - 0.3243(\ln Q_e) + 0.5024, R^2 = 0.999$$

$$j^- = -0.0005(\ln Q_e)^3 + 0.0424(\ln Q_e)^2 - 0.5298(\ln Q_e) + 9.4051, R^2 = 0.999$$

b) Training-set solutes included:

$$c = -3 \times 10^{-7} Q_e^3 + 0.0002 Q_e^2 - 0.015 Q_e - 17.218, R^2 = 0.995$$

$$e = -2 \times 10^{-7} Q_e^3 + 0.0002 Q_e^2 - 0.0341 Q_e + 10.685, R^2 = 0.999$$

$$s = 0.0118(\ln Q_e)^3 - 0.0324(\ln Q_e)^2 - 0.1808(\ln Q_e) + 2.0633, R^2 = 0.997$$

$$a = 0.0383(\ln Q_e)^3 - 0.0838(\ln Q_e)^2 - 0.0676(\ln Q_e) + 17.689, R^2 = 0.997$$

$$b = 0.0142(\ln Q_e)^3 - 0.1119(\ln Q_e)^2 + 0.7396(\ln Q_e) - 4.8562, R^2 = 0.995$$

$$v = 5E-08(\ln Q_e)^3 - 3E-05(\ln Q_e)^2 + 0.0009(\ln Q_e) - 0.9831, R^2 = 0.999$$

$$j^- = -0.0451(\ln Q_e)^3 + 0.3096(\ln Q_e)^2 - 0.9718(\ln Q_e) + 9.6444, R^2 = 0.991$$

c) All anions included:

$$c = -2 \times 10^{-7} Q_e^3 - 0.0002 Q_e^2 + 0.0559 Q_e - 16.835, R^2 = 0.996$$

$$e = -0.0198(\ln Q_e)^3 + 0.1373(\ln Q_e)^2 - 0.0242(\ln Q_e) + 11.668, R^2 = 0.99$$

$$s = -0.0102(\ln Q_e)^3 + 0.0249(\ln Q_e)^2 - 0.2977(\ln Q_e) + 1.605, R^2 = 0.9999$$

$$b = 0.0053(\ln Q_e)^3 - 0.857(\ln Q_e)^2 + 0.6493(\ln Q_e) - 4.6656, R^2 = 0.996$$

$$v = -0.0012(\ln Q_e)^3 + 0.0219(\ln Q_e)^2 - 0.2507(\ln Q_e) + 0.9639, R^2 = 0.999$$

$$j^- = -0.0199(\ln Q_e)^3 + 0.1755(\ln Q_e)^2 - 0.7877(\ln Q_e) + 8.7614, R^2 = 0.999$$

**Figure S4.** Correlations of the regression coefficients  $c$ ,  $e$ ,  $s$ ,  $b$ ,  $v$ , and  $j^-$  with  $Q_e$  for IRA-910 when a) all solutes; b) solutes in the training set; and c) all anions were included in the regressions. When only anions were involved in the model development, RMSE=1.44 when comparing the predicted  $C_e$  values with the experimental  $C_e$  values (data not shown).

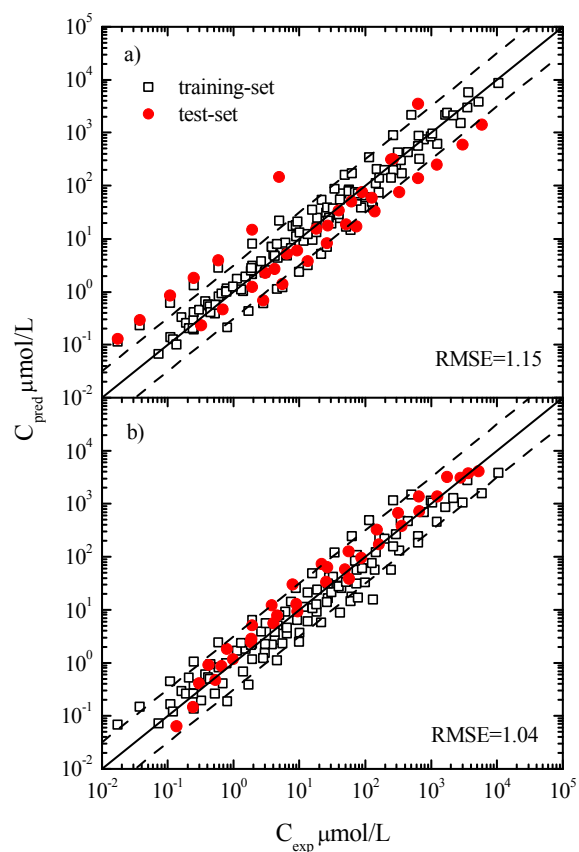

**Figure S5.** Model development with 16 solutes in the training set (a. 230 or b. 217 data points), a) the test set: acetate, FLU, 4-NA, 2-NBA, and NPN (73 data points), and b) the test set: CBA, 2,6-DCP, IB, IBU, and Phenol (86 data points). The test compounds in red circles were accurately predicted within the range of the training set of compounds. The solid lines show a perfect prediction, where the predicted values for  $C_e$  exactly equal the experimental values; the dashed lines are 0.5 log units above or below the solid lines.

## References:

- (1) Polanyi, M. Adsorption of gases (vapors) by a solid non-volatile adsorbent *Verh. Dtsch. Phys. Ges.* **1916**, *18*, 55-80.
- (2) Manes, M. In *Encyclopedia of Environmental Analysis and Remediation*; Meyers, R. S., Ed.; John Wiley & Sons: New York, 1998, p 26-68.
- (3) Yang, K.; B. Xing. Adsorption of organic compounds by carbon nanomaterials in aqueous phase: Polanyi theory and its application. *Chem. Rev.* **2010**, *110*, 5989–6008.
- (4) Yang, K.; W. Wu; Q. Jing; L. Zhu. Aqueous adsorption of aniline, phenol, and their substitutes by multi-walled carbon nanotubes. *Environ. Sci. Technol.* **2008**, *42*, 7931–7936.
- (5) Dubinin, M. M. The potential theory of adsorption of gases and vapors for adsorbents with energetically nonuniform surfaces. *Chem. Rev.* **1960**, *60*, 235-241.
- (6) Dubinin, M. M. *Physical adsorption of gases and vapors in micropores*; Academic Press Inc, **1975**; Vol. 9.
- (7) Dubinin, M. M. Fundamentals of the theory of adsorption in micropores of carbon adsorbents: Characteristics of their adsorption properties and microporous structures. *Carbon* **1989**, *27*, 457-467.
- (8) Crittenden, J. C.; S. Sanongraj;; J. L. Bulloch;; D. W. Hand;; T. N. Rogers;; T. F. Speth;; M. Ulmer. Correlation of aqueous-phase adsorption isotherms. *Environ. Sci. Technol.* **1999**, *33*, 2926–2933.
- (9) Dobruskin, V. K. Micropore volume filling. A condensation approximation approach as a foundation to the Dubinin-Astakhov equation. *Langmuir* **1998**, *14*, 3840–3846.
- (10) Pan, B.; H. Zhang. Interaction mechanisms and predictive model for the sorption of aromatic compounds onto nonionic resins. *J. Phys. Chem. C* **2013**, *117*, 17707–17715.
- (11) Zhu, D.; J. J. Pignatello. A concentration-dependent multi-term linear free energy relationship for sorption of organic compounds to soils based on the hexadecane dilute-solution reference state. *Environ. Sci. Technol.* **2005**, *39*, 8817-8828.
- (12) Chiou, C. T. *Partition and Adsorption of Organic Contaminants in Environmental Systems*; John Wiley & Sons: Hoboken, NJ, **2002**.
- (13) Schwarzenbach, R. P.; P. M. Gschwend; D. M. Imboden *Environmental Organic Chemistry*; 2nd ed.; John Wiley & Sons, Inc: Hoboken, New Jersey, **2003**.
